# Supplementary material for: The Submerged Dyslexia Iceberg: How Many School Children Are Not Diagnosed? Results from an Italian Study
Source: PLOS journal article supplement (doi:10.1371/journal.pone.0048082), 2012-10-31
Supplement: S2 (10.1371/journal.pone.0048082.s002) [file journal.pone.0048082.s002]

**Text S1. General criteria for dyslexia diagnosis defined by the Montecatini Consensus Conference (2007) [1] and by the subsequent national Consensus Conferences (2011) [2,3]**

- 1) Exclusion of conditions that might influence the results of the test, such as:
  - a. major sensory and neural disabilities;
  - b. significant emotional disorders;
  - c. environmental situation of socio-cultural disadvantage that can interfere with adequate formal education;
- 2) Intelligence quotient within normative limits: in case of adoption of single-dimensional tests (for example: Raven's Progressive Matrices), IQ not less than -1 standard deviation (equivalent to a score of 85) with respect to mean expected values by age; in case of multi-dimensional tests (for example: WISC-III scale), at least one single-dimensional IQ not less than -1 standard deviation (equivalent to a score of 85);
- 3) Administration of standardised reading tests: letters, words, non words, reading text;
- 4) Joint evaluation of both parameters of speed and accuracy;
- 5) Need to establish a significant distance from the expected mean values for the grade attended by the child in one of the two parameters, conventionally established at -2 SD from the mean for speed and below the 5th centile for accuracy;
- 6) Minimum age for diagnosis not before the end of the second year of primary school.

References

1. Consensus Conference (2007) Disturbi evolutivi specifici di apprendimento. Available: [www.lineeguidadsa.it/download\\_documentiDSA/RACCOMANDEAZIONI\\_PRATICA\\_CLINICA\\_DSA2007.zip](http://www.lineeguidadsa.it/download_documentiDSA/RACCOMANDEAZIONI_PRATICA_CLINICA_DSA2007.zip). Accessed: 01 September 2012.
2. PARCC (2011) DSA Documento d'intesa. Available: [www.lineeguidadsa.it/download\\_documentiDSA/Raccomandazioni\\_clinica\\_DSA11.zip](http://www.lineeguidadsa.it/download_documentiDSA/Raccomandazioni_clinica_DSA11.zip). Accessed: 01 September 2012.
3. Istituto Superiore di Sanità (2011) Consensus Conference Disturbi Specifici dell'Apprendimento. Sistema nazionale per le linee guida Ministero della salute. Available: [www.lineeguidadsa.it/download\\_documentiDSA/Raccomandazioni\\_CC\\_DSA.zip](http://www.lineeguidadsa.it/download_documentiDSA/Raccomandazioni_CC_DSA.zip). Accessed: 01 September 2012.
